# Supplementary material for: Spatial and Socio-Classification of Traffic Pollutant Emissions and Associated Mortality Rates in High-Density Hong Kong via Improved Data Analytic Approaches
Source: Int J Environ Res Public Health. 2021 Jun 17;18(12):6532. doi: 10.3390/ijerph18126532 (PMC8296480; doi:10.3390/ijerph18126532)
Supplement: Supplementary file 1 [file ijerph-18-06532-s001.zip › ijerph-1199221-supplementary.pdf]

## **Supplementary Information**

### **Spatial and Socio-Classification of Traffic Pollutant Emissions and Associated Mortality Rates in High-Density Hong Kong via Improved Data Analytic Approaches**

Hugo Wai Leung MAK <sup>1,2,3,\*</sup> and Daisy Chiu Yi NG <sup>4</sup>

<sup>1</sup> Department of Mathematics, The Hong Kong University of Science and Technology, Clear Water Bay, Kowloon, Hong Kong Special Administrative Region.

<sup>2</sup> Department of Geography, The University of Hong Kong, Hong Kong Special Administrative Region.

<sup>3</sup> Department of Electrical and Electronic Engineering, The University of Hong Kong, Hong Kong Special Administrative Region.

<sup>4</sup> Division of Environment and Sustainability, The Hong Kong University of Science and Technology, Clear Water Bay, Kowloon, Hong Kong Special Administrative Region.

\*Correspondence: [hwlmak@ust.hk](mailto:hwlmak@ust.hk)

#### **Table of Contents**

**Table S1.** Official demographic and socio quantities of 18 districts in Hong Kong, based on available official sources, with units indicated in brackets and year of attainment afterwards

**Table S2.** Exact number of roads in each district within Case Studies 1 – 4, based on geo-processing procedures in ArcGIS platform, and further spatial considerations, for assessments of NO<sub>x</sub> and PM<sub>2.5</sub> emissions respectively

**Table S3.** Averaged death rates of each district (per 100,000 people) in terms of diseases induced by NO<sub>x</sub> and PM<sub>2.5</sub> traffic emissions. The respective column heading represents the International Classification of Diseases (ICD) codes (Time Period: 2015 – 2018)

**Table S4.** Percentages of NO<sub>x</sub> and PM<sub>2.5</sub> emissions of each vehicle type within each district of Hong Kong, based on Case Study 1 (i.e., original traffic emissions without adjustments nor incorporation of social characteristics)

**Table S5.** Traffic NO<sub>x</sub> and PM<sub>2.5</sub> emissions and mortality rates (per 100,000 people) in different case studies, and the percentage of deviation (PD) as calculated by Equation (5) of the main text

**Table S6.** Comparison of statistical parameters of correlation plots between mortality and emission figures of NO<sub>x</sub> and PM<sub>2.5</sub>, by assuming linear regression and least-square fitting holds. Numerical figures in brackets are corresponding statistical parameters for Group 1 districts (G1 – residential districts,  $N = 7$ ) and Group 2 districts (G2 – non-residential districts,  $N = 11$ ) respectively, in that order, for Case Studies 3 and 4

**Figure S1.** Three territories of Hong Kong (i.e., New Territories, Kowloon, and Hong Kong Island) and surrounding areas, with the position of the Hong Kong International Airport included, as extracted from Hong Kong Hopping site

**Figure S2.** Population figures of 18 districts in Hong Kong

**Figure S3.** Example of handling long roads within Hong Kong (based on Section 2.3.1(c))

**Figure S4.** Illustration of Inverse Distance Weighting (IDW) method in calculating traffic emission at position  $Y$ , which is in between two points,  $X$  and  $Z$ , with known emission figures

**Table S1.** Official demographic and socio quantities of 18 districts in Hong Kong, based on available official sources, with units indicated in brackets and year of attainment afterwards

| District (Percentage of Population*) | Population - 2016* | Area (km <sup>2</sup> )- 2016* | Population Density (per km <sup>2</sup> )- 2016* | Population Growth (%) - 2016** | No. of road segments -2015 # | Geoid Length (m)-2015 # |
|--------------------------------------|--------------------|--------------------------------|--------------------------------------------------|--------------------------------|------------------------------|-------------------------|
| <b>HONG KONG ISLAND</b>              | <b>1,253,417</b>   | <b>79.68</b>                   | <b>15,691</b>                                    | <b>-1.2</b>                    | <b>4,137</b>                 | <b>451,256</b>          |
| Central and Western (3.32%)          | 243,266            | 12.44                          | 19,391                                           | -2.7                           | 1,498                        | 134,903                 |
| Eastern (7.57%)                      | 555,034            | 18.56                          | 30,861                                           | -2.8                           | 1,025                        | 127,333                 |
| Southern (3.75%)                     | 274,994            | 38.85                          | 7,080                                            | -0.6                           | 687                          | 100,783                 |
| Wan Chai (2.46%)                     | 180,123            | 9.83                           | 17,137                                           | -0.1                           | 927                          | 88,237                  |
| <b>KOWLOON</b>                       | <b>2,241,347</b>   | <b>46.93</b>                   | <b>47,748</b>                                    | <b>11.0</b>                    | <b>5,950</b>                 | <b>681,878</b>          |
| Sham Shui Po (5.54%)                 | 405,869            | 9.35                           | 43,381                                           | 11.0                           | 1,212                        | 119,385                 |
| Kowloon City (5.71%)                 | 418,732            | 10.02                          | 41,802                                           | 15.5                           | 1,343                        | 175,423                 |
| Kwun Tong (8.85%)                    | 648,541            | 11.27                          | 57,530                                           | 10.4                           | 1,047                        | 152,938                 |
| Wong Tai Sin (5.80%)                 | 425,235            | 9.30                           | 45,711                                           | 0.4                            | 542                          | 60,074                  |
| Yau Tsim Mong (4.68%)                | 342,970            | 6.99                           | 49,046                                           | 22.3                           | 1,806                        | 154,058                 |
| <b>NEW TERRITORIES</b>               | <b>3,840,620</b>   | <b>952.64</b>                  | <b>4,019</b>                                     | <b>7.5</b>                     | <b>9,903</b>                 | <b>1,767,642</b>        |
| Islands (2.14%)                      | 156,801            | 175.12                         | 886                                              | 14.4                           | 479                          | 285,417                 |
| Kwai Tsing (7.10%)                   | 520,572            | 23.34                          | 22,307                                           | -0.5                           | 1,403                        | 184,081                 |
| North (4.30%)                        | 315,270            | 136.61                         | 2,310                                            | 12.3                           | 1,048                        | 215,633                 |
| Sai Kung (6.30%)                     | 461,864            | 129.65                         | 3,563                                            | 13.6                           | 823                          | 136,663                 |
| Sha Tin (9.00%)                      | 659,794            | 68.71                          | 9,602                                            | 8.6                            | 1,567                        | 204,933                 |
| Tai Po (4.15%)                       | 303,926            | 136.15                         | 2,233                                            | 3.5                            | 837                          | 139,879                 |
| Tsuen Wan (4.35%)                    | 318,916            | 61.71                          | 5,149                                            | 10.5                           | 853                          | 136,812                 |
| Tuen Mun (6.68%)                     | 489,299            | 82.89                          | 5,894                                            | -2.5                           | 1,013                        | 163,154                 |
| Yuen Long (8.29%)                    | 607,200            | 138.46                         | 4,435                                            | 15.0                           | 1,880                        | 301,071                 |

\* Based on raw data obtained from “Population by Census 2016” – Percentage of Population Figures are corrected to 2 decimal places; Population Density figures are corrected to nearest km<sup>2</sup>.

\*\*All figures are corrected to 1 decimal place, and are obtained by comparing the population figures in 2016 with that of 2006.

# The number of road segments are obtained via geo-processing procedures conducted in ArcGIS, while all figures of Geoid Length are corrected to nearest m. The road network data of all 18 districts are obtained from DATA.GOV.HK.

**Table S2.** Exact number of roads in each district within Case Studies 1 – 4, based on geo-processing procedures in ArcGIS platform, and further spatial considerations, for assessments of NO<sub>x</sub> and PM<sub>2.5</sub> emissions respectively

| <b>District (Percentage reduction of roads – Case Study 4 versus Case Study 1)*</b> | <b>Case Study 1<br/>NO<sub>x</sub> (PM<sub>2.5</sub>)</b> | <b>Case Study 2<br/>NO<sub>x</sub> (PM<sub>2.5</sub>)</b> | <b>Case Study 3<br/>NO<sub>x</sub> / PM<sub>2.5</sub><sup>#</sup></b> | <b>Case Study 4<br/>NO<sub>x</sub> / PM<sub>2.5</sub><sup>#</sup></b> |
|-------------------------------------------------------------------------------------|-----------------------------------------------------------|-----------------------------------------------------------|-----------------------------------------------------------------------|-----------------------------------------------------------------------|
| <b><i>HONG KONG ISLAND</i></b>                                                      | <b>4,014 (4,008)</b>                                      | <b>3,821 (3,821)</b>                                      | <b>4,008</b>                                                          | <b>3,246</b>                                                          |
| Central and Western (18.35%)                                                        | 1,444 (1,443)                                             | 1,346 (1,369)                                             | 1,443                                                                 | 1,179                                                                 |
| Eastern (23.39%)                                                                    | 992 (991)                                                 | 945 (965)                                                 | 991                                                                   | 760                                                                   |
| Southern (20.15%)                                                                   | 665 (663)                                                 | 650 (641)                                                 | 663                                                                   | 531                                                                   |
| Wan Chai (15.01%)                                                                   | 913 (911)                                                 | 880 (846)                                                 | 911                                                                   | 776                                                                   |
| <b><i>KOWLOON</i></b>                                                               | <b>5,759 (5,743)</b>                                      | <b>5,354 (5,385)</b>                                      | <b>5,743</b>                                                          | <b>4,213</b>                                                          |
| Sham Shui Po (33.52%)                                                               | 1,223 (1,223)                                             | 1,098 (1,098)                                             | 1,223                                                                 | 813                                                                   |
| Kowloon City (21.73%)                                                               | 1,275 (1,272)                                             | 1,216 (1,216)                                             | 1,272                                                                 | 998                                                                   |
| Kwun Tong (26.65%)                                                                  | 953 (950)                                                 | 892 (892)                                                 | 950                                                                   | 699                                                                   |
| Wong Tai Sin (28.04%)                                                               | 535 (527)                                                 | 480 (480)                                                 | 527                                                                   | 385                                                                   |
| Yau Tsim Mong (25.66%)                                                              | 1,773 (1,771)                                             | 1,668 (1,699)                                             | 1,771                                                                 | 1,318                                                                 |
| <b><i>NEW TERRITORIES</i></b>                                                       | <b>9,509 (9,472)</b>                                      | <b>9,025 (9,025)</b>                                      | <b>9,472</b>                                                          | <b>5,041</b>                                                          |
| Islands (50.54%)                                                                    | 370 (365)                                                 | 356 (356)                                                 | 365                                                                   | 183                                                                   |
| Kwai Tsing (48.94%)                                                                 | 1,373 (1,365)                                             | 1,336 (1,336)                                             | 1,365                                                                 | 701                                                                   |
| North (34.40%)                                                                      | 965 (965)                                                 | 914 (914)                                                 | 965                                                                   | 633                                                                   |
| Sai Kung (39.72%)                                                                   | 773 (765)                                                 | 732 (732)                                                 | 765                                                                   | 466                                                                   |
| Sha Tin (50.39%)                                                                    | 1,538 (1,522)                                             | 1,421 (1,421)                                             | 1,522                                                                 | 763                                                                   |
| Tai Po (48.16%)                                                                     | 814 (814)                                                 | 769 (769)                                                 | 814                                                                   | 422                                                                   |
| Tsuen Wan (43.74%)                                                                  | 839 (839)                                                 | 783 (783)                                                 | 839                                                                   | 472                                                                   |
| Tuen Mun (42.12%)                                                                   | 1,002 (1,002)                                             | 951 (951)                                                 | 1,002                                                                 | 580                                                                   |
| Yuen Long (55.26%)                                                                  | 1,835 (1,835)                                             | 1,763 (1,763)                                             | 1,835                                                                 | 821                                                                   |

\* All numerical figures are corrected to 2 decimal places.

# All districts have the same number of roads for NO<sub>x</sub> and PM<sub>2.5</sub> assessments for Case Study 3 and 4.

**Table S3.** Averaged death rates of each district (per 100,000 people) in terms of diseases induced by NO<sub>x</sub> and PM<sub>2.5</sub> traffic emissions. The respective column heading represents the International Classification of Diseases (ICD) codes (Time Period: 2015 – 2018)<sup>#</sup>

| District                | A15-<br>A16<br>** | C33-<br>C34<br>** | E10-<br>E14 * | I20,<br>I23-<br>I25 * | I26 * | I60-<br>I69 * | J00-<br>J06,J30-<br>J39,<br>J60-J98<br>** | J12-<br>J18 * | J20-<br>J22 * | J40-<br>J47<br>** |
|-------------------------|-------------------|-------------------|---------------|-----------------------|-------|---------------|-------------------------------------------|---------------|---------------|-------------------|
| <b>HONG KONG ISLAND</b> |                   |                   |               |                       |       |               |                                           |               |               |                   |
| Central and Western     | 1.92              | 61.23             | 6.04          | 40.64                 | 0.27  | 66.17         | 17.85                                     | 121.91        | 0.14          | 26.91             |
| Eastern                 | 2.04              | 77.17             | 8.21          | 46.35                 | 0.54  | 63.20         | 12.71                                     | 180.42        | 0.06          | 27.88             |
| Southern                | 2.13              | 82.55             | 10.29         | 47.42                 | 1.00  | 69.88         | 25.84                                     | 161.96        | 0.13          | 37.64             |
| Wan Chai                | 1.77              | 55.48             | 6.30          | 37.58                 | 0.59  | 55.09         | 13.18                                     | 137.52        | ---           | 19.48             |
| <b>KOWLOON</b>          |                   |                   |               |                       |       |               |                                           |               |               |                   |
| Sham Shui Po            | 3.03              | 60.94             | 10.69         | 41.16                 | 1.01  | 66.41         | 8.92                                      | 131.82        | 0.08          | 28.28             |
| Kowloon City            | 2.28              | 63.71             | 8.29          | 42.42                 | 1.06  | 59.56         | 9.59                                      | 209.82        | 0.16          | 26.57             |
| Kwun Tong               | 4.93              | 88.34             | 7.39          | 47.12                 | 0.98  | 57.64         | 15.71                                     | 144.44        | 0.1           | 37.62             |
| Wong Tai Sin            | 3.23              | 95.99             | 10.02         | 58.05                 | 1.1   | 68.7          | 11.91                                     | 203.01        | 0.08          | 41.96             |
| Yau Tsim Mong           | 4.24              | 82.38             | 13.61         | 47.90                 | 1.01  | 86.22         | 14.02                                     | 240.70        | 0.2           | 31.76             |
| <b>NEW TERRITORIES</b>  |                   |                   |               |                       |       |               |                                           |               |               |                   |
| Islands                 | 1.08              | 46.52             | 5.41          | 33.10                 | 0.65  | 34.62         | 8.44                                      | 84.81         | 0.22          | 16.88             |
| Kwai Tsing              | 3.80              | 81.90             | 10.56         | 47.93                 | 1.11  | 62.56         | 12.85                                     | 192.52        | 0.13          | 30.56             |
| North                   | 2.89              | 65.93             | 8.03          | 36.50                 | 0.96  | 52.87         | 10.49                                     | 148.77        | 0.11          | 34.68             |
| Sai Kung                | 2.32              | 54.97             | 5.58          | 23.03                 | 1.01  | 35.27         | 9.05                                      | 94.29         | ---           | 15.06             |
| Sha Tin                 | 1.71              | 68.70             | 6.92          | 32.40                 | 0.65  | 45.23         | 16.15                                     | 96.64         | 0.10          | 21.96             |
| Tai Po                  | 2.42              | 66.41             | 8.80          | 41.89                 | 1.43  | 57.39         | 12.64                                     | 133.92        | ---           | 32.44             |
| Tsuen Wan               | 2.37              | 58.80             | 10.00         | 37.95                 | 0.86  | 58.37         | 13.12                                     | 193.29        | 0.11          | 23.97             |
| Tuen Mun                | 1.65              | 70.12             | 8.92          | 40.34                 | 1.51  | 57.49         | 11.53                                     | 123.35        | 0.14          | 24.56             |
| Yuen Long               | 2.17              | 61.19             | 7.92          | 33.58                 | 0.81  | 46.11         | 9.44                                      | 108.44        | 0.16          | 24.41             |

<sup>#</sup> The datasets are obtained from HealthyHK, Department of Health, HKSAR Government, and represent the averaged figures throughout the recent 4 years.

\* Potential diseases induced by PM<sub>2.5</sub> traffic emission (i.e., not applicable for NO<sub>x</sub>) – in italic representation: E10-E14: Diabetes mellitus; I20, I23-I25: Other ischaemic heart diseases; I26: Pulmonary embolism; I60-I69: Cerebrovascular diseases; J12-J18: Pneumonia; J20-J22: Other acute lower respiratory infections.

\*\* Potential diseases induced by both PM<sub>2.5</sub> and NO<sub>x</sub> traffic emission, including A15-A16: Respiratory tuberculosis; C33-C34: Malignant neoplasm of trachea, bronchus and lung; J00-J06, J30-J39, J60-J98: Remainder of diseases of the respiratory system; and J40-J47: Chronic lower respiratory diseases.

**Table S4.** Percentages of NO<sub>x</sub> and PM<sub>2.5</sub> emissions of each vehicle type within each district of Hong Kong, based on Case Study 1 (i.e., original traffic emissions without adjustments nor incorporation of social characteristics)

**(a) NO<sub>x</sub> Emissions (Case Study 1)**

| <b>District</b>                | <b>Private Car (%)<sup>*</sup></b> | <b>Taxi (%)<sup>*</sup></b> | <b>SPB (%)<sup>*</sup></b> | <b>LV (%)<sup>*</sup></b> | <b>LGV (%)<sup>*</sup></b> | <b>MGV+HGV (%)<sup>*</sup></b> | <b>PLB (%)<sup>*</sup></b> | <b>Bus (%)<sup>*</sup></b> |
|--------------------------------|------------------------------------|-----------------------------|----------------------------|---------------------------|----------------------------|--------------------------------|----------------------------|----------------------------|
| <b><i>HONG KONG ISLAND</i></b> |                                    |                             |                            |                           |                            |                                |                            |                            |
| Central and Western            | 2.75                               | 14.45                       | 12.10                      | 2.99                      | 6.73                       | 7.97                           | 5.22                       | 47.79                      |
| Eastern                        | 2.79                               | 7.18                        | 9.86                       | 4.69                      | 10.69                      | 14.36                          | 4.29                       | 46.14                      |
| Southern                       | 2.44                               | 5.46                        | 11.76                      | 2.86                      | 7.77                       | 7.80                           | 8.59                       | 53.33                      |
| Wan Chai                       | 3.92                               | 12.52                       | 12.79                      | 3.80                      | 7.65                       | 10.12                          | 4.75                       | 44.45                      |
| <b><i>KOWLOON</i></b>          |                                    |                             |                            |                           |                            |                                |                            |                            |
| Sham Shui Po                   | 2.47                               | 6.53                        | 6.97                       | 5.91                      | 16.56                      | 23.49                          | 3.79                       | 34.27                      |
| Kowloon City                   | 3.51                               | 10.29                       | 9.33                       | 6.49                      | 13.66                      | 16.02                          | 6.16                       | 34.53                      |
| Kwun Tong                      | 3.02                               | 6.62                        | 6.60                       | 5.70                      | 14.09                      | 22.55                          | 7.33                       | 34.09                      |
| Wong Tai Sin                   | 2.90                               | 6.25                        | 7.68                       | 4.67                      | 11.08                      | 18.68                          | 7.82                       | 40.92                      |
| Yau Tsim Mong                  | 2.76                               | 9.57                        | 10.55                      | 6.64                      | 14.41                      | 16.05                          | 4.95                       | 35.07                      |
| <b><i>NEW TERRITORIES</i></b>  |                                    |                             |                            |                           |                            |                                |                            |                            |
| Islands                        | 1.44                               | 6.15                        | 12.00                      | 1.47                      | 6.57                       | 19.06                          | 0                          | 53.35                      |
| Kwai Tsing                     | 1.41                               | 2.98                        | 5.63                       | 3.03                      | 10.12                      | 45.89                          | 4.74                       | 26.18                      |
| North                          | 2.55                               | 3.11                        | 6.84                       | 4.09                      | 10.36                      | 35.40                          | 5.09                       | 32.56                      |
| Sai Kung                       | 3.01                               | 4.26                        | 6.44                       | 4.08                      | 10.18                      | 41.01                          | 6.64                       | 24.37                      |
| Sha Tin                        | 2.58                               | 3.45                        | 8.64                       | 4.58                      | 11.11                      | 24.99                          | 3.99                       | 40.67                      |
| Tai Po                         | 3.82                               | 3.17                        | 6.88                       | 5.99                      | 15.20                      | 36.44                          | 4.17                       | 24.34                      |
| Tsuen Wan                      | 2.13                               | 2.59                        | 4.91                       | 3.82                      | 12.36                      | 46.22                          | 2.68                       | 25.30                      |
| Tuen Mun                       | 1.39                               | 1.51                        | 3.87                       | 2.68                      | 9.42                       | 59.37                          | 1.99                       | 19.76                      |
| Yuen Long                      | 2.06                               | 2.09                        | 7.86                       | 2.72                      | 11.61                      | 44.41                          | 3.59                       | 25.67                      |

SPB: Private light bus and Non-franchised Buses; LV: Van-typed Light Goods Vehicle with less than 3.5 tonnes; LGV: Light Goods Vehicles with 2-axles; MGV+HGV: Medium Goods Vehicles with longer than 6 m; PLB: Green and Red Minibuses

\* All numerical figures are corrected to 2 decimal places.

**(b) PM<sub>2.5</sub> Emissions (Case Study 1)**

| <b>District</b>                | <b>Private Car (%)*</b> | <b>Taxi (%)*</b> | <b>SPB (%)*</b> | <b>LV (%)*</b> | <b>LGV (%)*</b> | <b>MGV+HGV (%)*</b> | <b>PLB (%)*</b> | <b>Bus (%)*</b> |
|--------------------------------|-------------------------|------------------|-----------------|----------------|-----------------|---------------------|-----------------|-----------------|
| <b><i>HONG KONG ISLAND</i></b> |                         |                  |                 |                |                 |                     |                 |                 |
| Central and Western            | 6.94                    | 0                | 14.73           | 6.23           | 7.09            | 11.54               | 17.12           | 36.35           |
| Eastern                        | 5.44                    | 0                | 10.94           | 8.45           | 9.92            | 18.80               | 13.08           | 33.37           |
| Southern                       | 5.54                    | 0                | 12.55           | 5.22           | 7.20            | 9.92                | 24.27           | 35.30           |
| Wan Chai                       | 9.39                    | 0                | 14.89           | 7.38           | 7.23            | 13.64               | 14.66           | 32.81           |
| <b><i>KOWLOON</i></b>          |                         |                  |                 |                |                 |                     |                 |                 |
| Sham Shui Po                   | 4.08                    | 0                | 7.40            | 10.93          | 14.92           | 28.14               | 9.39            | 25.13           |
| Kowloon City                   | 6.38                    | 0                | 9.85            | 11.89          | 12.03           | 18.65               | 16.52           | 24.68           |
| Kwun Tong                      | 5.37                    | 0                | 6.55            | 9.84           | 11.92           | 25.86               | 18.06           | 22.40           |
| Wong Tai Sin                   | 4.82                    | 0                | 7.75            | 8.49           | 9.26            | 20.98               | 21.32           | 27.38           |
| Yau Tsim Mong                  | 5.24                    | 0                | 11.03           | 12.32          | 13.22           | 19.71               | 13.39           | 25.08           |
| <b><i>NEW TERRITORIES</i></b>  |                         |                  |                 |                |                 |                     |                 |                 |
| Islands                        | 2.65                    | 0                | 14.70           | 2.71           | 7.36            | 25.65               | 0               | 46.92           |
| Kwai Tsing                     | 1.79                    | 0                | 4.93            | 4.66           | 7.82            | 51.93               | 12.23           | 16.65           |
| North                          | 3.88                    | 0                | 7.16            | 6.69           | 9.06            | 37.99               | 12.67           | 22.55           |
| Sai Kung                       | 4.77                    | 0                | 5.97            | 6.54           | 7.85            | 46.08               | 13.95           | 14.85           |
| Sha Tin                        | 3.85                    | 0                | 9.63            | 7.85           | 9.47            | 27.31               | 11.81           | 30.08           |
| Tai Po                         | 5.28                    | 0                | 6.88            | 9.28           | 12.81           | 38.54               | 10.61           | 16.61           |
| Tsuen Wan                      | 3.12                    | 0                | 4.75            | 6.51           | 10.46           | 51.81               | 6.30            | 17.07           |
| Tuen Mun                       | 2.01                    | 0                | 3.64            | 4.21           | 7.57            | 65.89               | 4.55            | 12.13           |
| Yuen Long                      | 2.91                    | 0                | 8.29            | 4.21           | 10.13           | 48.86               | 7.99            | 17.63           |

SPB: Private light bus and Non-franchised Buses; LV: Van-typed Light Goods Vehicle with less than 3.5 tonnes;  
LGV: Light Goods Vehicles with 2-axles; MGV+HGV: Medium Goods Vehicles with longer than 6 m;  
PLB: Green and Red Minibuses

\* All numerical figures are corrected to 2 decimal places.

**Table S5.** Traffic NO<sub>x</sub> and PM<sub>2.5</sub> emissions and mortality rates (per 100,000 people) in different case studies, and the percentage of deviation (PD) as calculated by Equation (5) of the main text

**(a) The case of NO<sub>x</sub>**

| District                       | Case<br>Study 1<br>Emission<br>(10 <sup>9</sup> g/km)* | Case<br>Study 2<br>Emission<br>(10 <sup>9</sup> g/km)* | Case<br>Study 3<br>Emission<br>(10 <sup>9</sup> g/km)* | Case<br>Study 4<br>Emission<br>(10 <sup>9</sup> g/km)* | Mortality<br>Rate (per<br>100,000<br>people)* | Diff.** | PD (%)* |
|--------------------------------|--------------------------------------------------------|--------------------------------------------------------|--------------------------------------------------------|--------------------------------------------------------|-----------------------------------------------|---------|---------|
| <b><i>HONG KONG ISLAND</i></b> |                                                        |                                                        |                                                        |                                                        |                                               |         |         |
| Central and Western            | 2.79                                                   | 0.86                                                   | 1.70                                                   | 1.55                                                   | 107.91                                        | – 4.48  | – 4.15  |
| Eastern                        | 2.84                                                   | 1.22                                                   | 2.55                                                   | 1.81                                                   | 119.80                                        | – 1.00  | – 0.83  |
| Southern                       | 2.37                                                   | 0.85                                                   | 1.99                                                   | 1.82                                                   | 148.16                                        | 26.99   | 18.22   |
| Wan Chai                       | 1.73                                                   | 0.53                                                   | 1.12                                                   | 0.92                                                   | 89.91                                         | – 2.37  | – 2.64  |
| <b><i>KOWLOON</i></b>          |                                                        |                                                        |                                                        |                                                        |                                               |         |         |
| Sham Shui Po                   | 2.47                                                   | 0.61                                                   | 1.38                                                   | 1.18                                                   | 101.17                                        | 0.56    | 0.55    |
| Kowloon City                   | 2.44                                                   | 0.65                                                   | 1.42                                                   | 1.29                                                   | 102.15                                        | – 2.01  | – 1.97  |
| Kwun Tong                      | 3.90                                                   | 1.70                                                   | 2.74                                                   | 2.23                                                   | 146.60                                        | 12.07   | 8.23    |
| Wong Tai Sin                   | 2.13                                                   | 0.77                                                   | 2.19                                                   | 1.79                                                   | 153.09                                        | 32.87   | 21.47   |
| Yau Tsim Mong                  | 4.22                                                   | 1.26                                                   | 2.35                                                   | 2.25                                                   | 132.40                                        | – 2.80  | – 2.11  |
| <b><i>NEW TERRITORIES</i></b>  |                                                        |                                                        |                                                        |                                                        |                                               |         |         |
| Islands                        | 1.14                                                   | 0.34                                                   | 0.77                                                   | 0.25                                                   | 72.92                                         | 2.32    | 3.18    |
| Kwai Tsing                     | 5.03                                                   | 2.00                                                   | 3.21                                                   | 2.12                                                   | 129.11                                        | – 1.86  | – 1.44  |
| North                          | 3.08                                                   | 1.07                                                   | 2.28                                                   | 1.77                                                   | 113.99                                        | – 5.72  | – 5.02  |
| Sai Kung                       | 1.87                                                   | 0.54                                                   | 1.24                                                   | 0.66                                                   | 81.40                                         | – 2.47  | – 3.03  |
| Sha Tin                        | 3.41                                                   | 1.48                                                   | 2.01                                                   | 1.69                                                   | 108.52                                        | – 8.37  | – 7.72  |
| Tai Po                         | 3.38                                                   | 1.12                                                   | 1.82                                                   | 1.56                                                   | 113.91                                        | 1.20    | 1.05    |
| Tsuen Wan                      | 2.78                                                   | 0.86                                                   | 1.85                                                   | 1.23                                                   | 98.26                                         | – 3.87  | – 3.94  |
| Tuen Mun                       | 3.30                                                   | 0.91                                                   | 1.84                                                   | 1.63                                                   | 107.86                                        | – 7.32  | – 6.79  |
| Yuen Long                      | 5.00                                                   | 1.24                                                   | 2.34                                                   | 2.12                                                   | 97.21                                         | – 33.74 | – 34.71 |

\* All numerical figures are corrected to 2 decimal places.

\*\* Difference (Diff.) is defined as  $MR_P - MR_A$ , where  $MR_P$  and  $MR_A$  are the predicted and actual mortality rates (per 100,000 people) respectively.

(b) The case of PM<sub>2.5</sub>

| District                | Case<br>Study 1<br>Emission<br>(10 <sup>7</sup> g/km)* | Case<br>Study 2<br>Emission<br>(10 <sup>7</sup> g/km)* | Case<br>Study 3<br>Emission<br>(10 <sup>7</sup> g/km)* | Case<br>Study 4<br>Emission<br>(10 <sup>7</sup> g/km)* | Mortality<br>Rate (per<br>100,000<br>people)* | Diff.** | PD (%)* |
|-------------------------|--------------------------------------------------------|--------------------------------------------------------|--------------------------------------------------------|--------------------------------------------------------|-----------------------------------------------|---------|---------|
| <b>HONG KONG ISLAND</b> |                                                        |                                                        |                                                        |                                                        |                                               |         |         |
| Central and Western     | 7.78                                                   | 3.06                                                   | 6.39                                                   | 4.55                                                   | 343.08                                        | – 10.18 | – 2.97  |
| Eastern                 | 11.23                                                  | 5.07                                                   | 9.26                                                   | 5.57                                                   | 418.58                                        | 36.97   | 8.83    |
| Southern                | 13.38                                                  | 3.68                                                   | 7.91                                                   | 5.38                                                   | 438.84                                        | 62.52   | 14.25   |
| Wan Chai                | 7.22                                                   | 1.45                                                   | 3.32                                                   | 2.75                                                   | 326.99                                        | 23.82   | 7.29    |
| <b>KOWLOON</b>          |                                                        |                                                        |                                                        |                                                        |                                               |         |         |
| Sham Shui Po            | 8.43                                                   | 2.64                                                   | 6.20                                                   | 3.65                                                   | 352.34                                        | 24.23   | 6.88    |
| Kowloon City            | 13.71                                                  | 4.13                                                   | 8.72                                                   | 6.24                                                   | 423.46                                        | 23.19   | 5.48    |
| Kwun Tong               | 18.43                                                  | 4.84                                                   | 10.30                                                  | 6.22                                                   | 404.27                                        | 4.31    | 1.07    |
| Wong Tai Sin            | 10.68                                                  | 4.69                                                   | 9.56                                                   | 6.87                                                   | 494.05                                        | 76.21   | 15.42   |
| Yau Tsim Mong           | 15.44                                                  | 5.83                                                   | 11.50                                                  | 8.11                                                   | 522.04                                        | 69.54   | 13.32   |
| <b>NEW TERRITORIES</b>  |                                                        |                                                        |                                                        |                                                        |                                               |         |         |
| Islands                 | 2.84                                                   | 0.73                                                   | 1.42                                                   | 0.62                                                   | 231.73                                        | – 11.94 | – 5.15  |
| Kwai Tsing              | 31.07                                                  | 7.30                                                   | 15.40                                                  | 9.10                                                   | 443.92                                        | – 36.21 | – 8.16  |
| North                   | 11.18                                                  | 3.41                                                   | 7.27                                                   | 3.96                                                   | 361.23                                        | 24.35   | 6.74    |
| Sai Kung                | 6.60                                                   | 1.45                                                   | 3.27                                                   | 1.64                                                   | 240.58                                        | – 31.50 | – 13.09 |
| Sha Tin                 | 10.45                                                  | 3.90                                                   | 8.29                                                   | 4.82                                                   | 290.46                                        | – 70.41 | – 24.24 |
| Tai Po                  | 10.44                                                  | 5.08                                                   | 8.13                                                   | 4.57                                                   | 357.34                                        | 3.55    | 0.99    |
| Tsuen Wan               | 20.24                                                  | 6.77                                                   | 10.23                                                  | 6.05                                                   | 398.84                                        | 3.68    | 0.92    |
| Tuen Mun                | 15.26                                                  | 7.10                                                   | 10.75                                                  | 6.28                                                   | 339.61                                        | – 61.78 | – 18.19 |
| Yuen Long               | 16.97                                                  | 4.83                                                   | 10.23                                                  | 7.11                                                   | 294.23                                        | –130.48 | – 44.35 |

\* All numerical figures are corrected to 2 decimal places.

\*\* Difference (Diff.) is defined as  $MR_P - MR_A$ , where  $MR_P$  and  $MR_A$  are the predicted and actual mortality rates (per 100,000 people) respectively.

**Table S6.** Comparison of statistical parameters of correlation plots between mortality and emission figures of  $\text{NO}_x$  and  $\text{PM}_{2.5}$ , by assuming linear regression and least-square fitting holds. Numerical figures in brackets are corresponding statistical parameters for Group 1 districts (G1 – residential districts,  $N = 7$ ) and Group 2 districts (G2 – non-residential districts,  $N = 11$ ) respectively, in that order, for Case Studies 3 and 4

|                     | Mortality Rate (y) against Traffic Emission (x)<br><u><math>\text{NO}_x</math></u>                                                                                                                                    | Mortality Rate (y) against Traffic Emission (x)<br><u><math>\text{PM}_{2.5}</math></u>                                                                                                                                                   |
|---------------------|-----------------------------------------------------------------------------------------------------------------------------------------------------------------------------------------------------------------------|------------------------------------------------------------------------------------------------------------------------------------------------------------------------------------------------------------------------------------------|
| <b>Case Study 1</b> | Best-fit line: $y = 7.88 \times 10^{-9}x + 88.86$<br>$R$ value: 0.371<br>RMSE: 21.5<br>$p$ value: 0.129<br>F-stat: 2.56                                                                                               | Best-fit line: $y = 6.38 \times 10^{-7}x + 289.16$<br>$R$ value: 0.509<br>RMSE: 70.7<br>$p$ value: 0.031<br>F-stat: 5.59                                                                                                                 |
| <b>Case Study 2</b> | Best-fit line: $y = 2.81 \times 10^{-8}x + 84.39$<br>$R$ value: 0.539<br>RMSE: 19.5<br>$p$ value: 0.0208<br>F-stat: 6.58                                                                                              | Best-fit line: $y = 2.48 \times 10^{-6}x + 266.48$<br>$R$ value: 0.593<br>RMSE: 66.1<br>$p$ value: 0.0094<br>F-stat: 8.71                                                                                                                |
| <b>Case Study 3</b> | Best-fit line: $y = 2.65 \times 10^{-8}x + 61.27$<br>$R$ value: 0.720 (G1: 0.819, G2: 0.815)<br>RMSE: 16.1 (G1: 13.4, G2: 14.8)<br>$p$ value: 0.000756 (G1: 0.0245, G2: 0.00222)<br>F-stat: 17.2 (G1: 10.1, G2: 17.9) | Best-fit line: $y = 1.62 \times 10^{-6}x + 237.97$<br>$R$ value: 0.674 (G1: 0.777, G2: 0.889)<br>RMSE: 60.7 (G1: 52.8, G2: 39.3)<br>$p$ value: 0.00218 (G1: 0.0399, G2: 0.000253)<br>F-stat: 13.3 (G1: 7.6, G2: 33.9)                    |
| <b>Case Study 4</b> | Best-fit line: $y = 3.23 \times 10^{-8}x + 62.43$<br>$R$ value: 0.783 (G1: 0.760, G2: 0.850)<br>RMSE: 14.4 (G1: 15.2, G2: 13.5)<br>$p$ value: 0.000121 (G1: 0.0473, G2: 0.000932)<br>F-stat: 25.4 (G1: 6.9, G2: 23.3) | Best-fit line: $y = 2.79 \times 10^{-6}x + 226.32$<br>$R$ value: 0.754 (G1: 0.717, G2: 0.958)<br>RMSE: 54.0 (G1: 58.4, G2: 24.6)<br>$p$ value: 0.000304<br>(G1: 0.0697, G2: $3.56 \times 10^{-6}$ )<br>F-stat: 21.0 (G1: 5.3, G2: 100.0) |

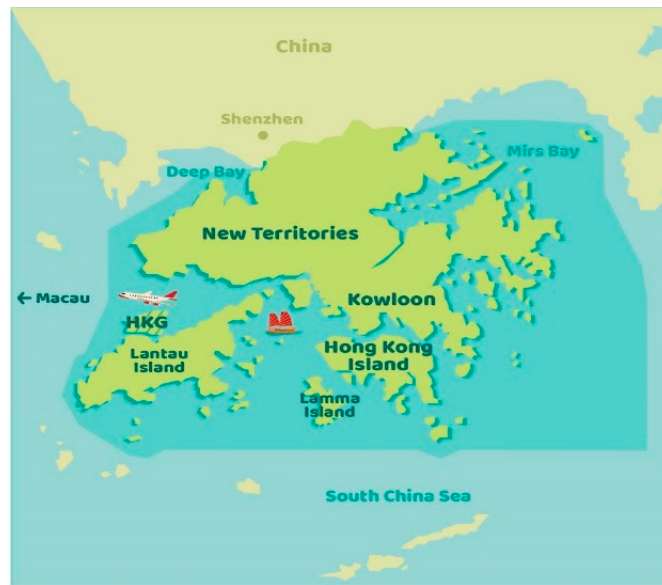

**Figure S1.** Three territories of Hong Kong (i.e., New Territories, Kowloon, and Hong Kong Island) and surrounding areas, with the position of the Hong Kong International Airport included, as extracted from Hong Kong Hopping site

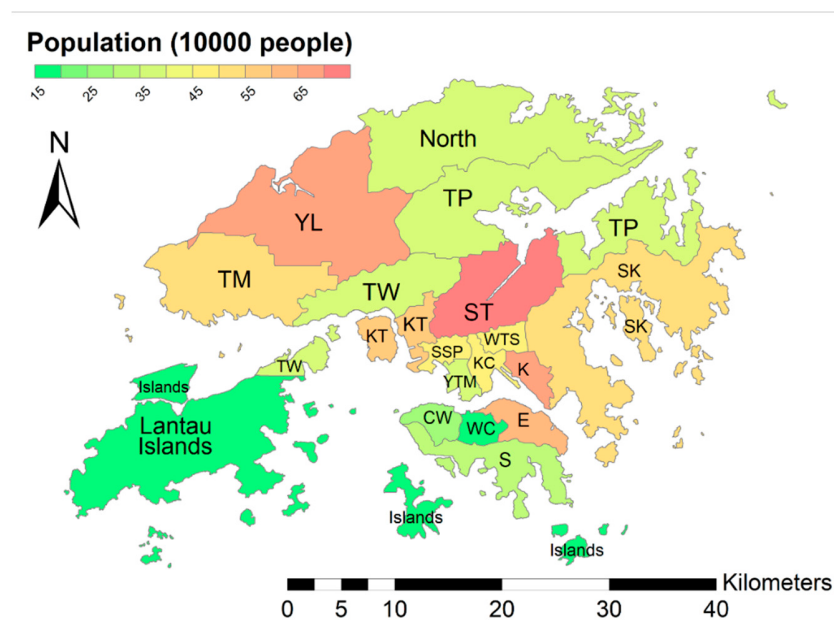

**Figure S2.** Population figures of 18 districts in Hong Kong. The color bar ranges from 150,000 to 700,000 people. Labels and distribution of districts in 3 territories of Hong Kong are as provided. *New Territories* (from right to left) – Islands; TM: Tuen Mun; YL: Yuen Long; TW: Tsuen Wan; North; TP: Tai Po; ST: Sha Tin; SK: Sai Kung; *Kowloon* (from right to left) – KT: Kwai Tsing; SSP: Sham Shui Po; YTM: Yau Tsim Mong; KC: Kowloon City; WTS: Wong Tai Sin; K: Kwun Tong; *Hong Kong Island* (from right to left) – CW: Central and Western; S: Southern; WC: Wan Chai; E: Eastern

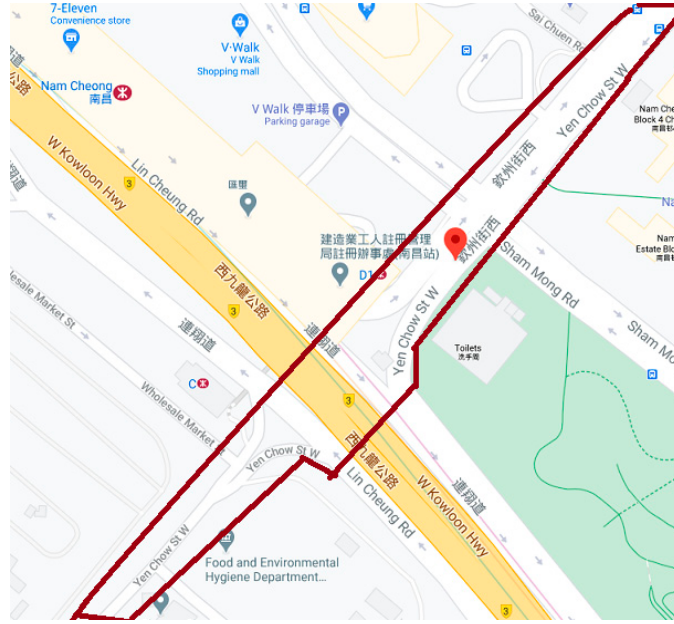

**Figure S3.** Example of handling long roads within Hong Kong (based on Section 2.3.1(c)). The spatial location of Yen Chow Street West (surrounded by the brown box, as extracted from Google Map), which passes through two districts of Hong Kong, namely Sham Shui Po and Yau Tsim Mong. Surrounding red symbols represent MTR stations, while blue pointers indicate convenience store, shopping malls and car parks

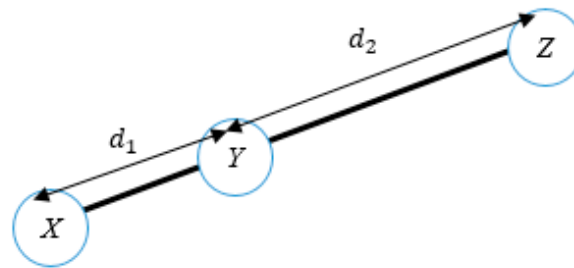

**Figure S4.** Illustration of Inverse Distance Weighting (IDW) method in calculating traffic emission at position Y, which is in between two points, X and Z, with known emission figures

## References

DATA.GOV.HK. Road Network, Transport Department. Available online: [https://data.gov.hk/en-data/dataset/hk-td-tis\\_6-road-network](https://data.gov.hk/en-data/dataset/hk-td-tis_6-road-network) (accessed on 2 Mar 2021).

HealthyHK, Department of Health, HKSAR Government. Death Statistics - by sex, age and residential district, causes of death in tabulation list of the International Classification of Diseases (from 2001 onwards). Available online: [https://www.healthyhk.gov.hk/phsweb/enquiry/mo\\_ysad10\\_e.html](https://www.healthyhk.gov.hk/phsweb/enquiry/mo_ysad10_e.html) (accessed on 2 Mar 2021).

Hong Kong Hopping. So Where is Hong Kong Exactly.  
<https://www.hongkonghopping.com/location.html> (accessed on 27 Apr 2021).

Population by Census, 2016. Main Tables. Available online: <https://www.bycensus2016.gov.hk/en/bc-mt.html> (accessed on 2 Mar 2021).
